# Effects of Halothane on Delayed Afterdepolarization and Calcium Transients in Dog Ventricular Myocytes Exposed to Isoproterenol

Lisa C. Freeman, D.V.M., Ph.D.,\* Qian Li, Ph.D.†

The effects of halothane on isoproterenol-induced delayed afterdepolarizations (DADs) were investigated in canine ventricular myocytes. In addition, the effects of halothane on the intracellular free calcium transient were determined in fura-2-loaded myocytes exposed to isoproterenol to explore the mechanisms underlying halothane effects on DADs. Isoproterenol (100 nM) induced DADs and/or undriven action potentials in myocytes stimulated electrically with the use of trains of 10 stimuli delivered at basic drive cycle lengths of 200–1,000 ms. Isoproterenol (100 nM) increased the peak ratio (350/380 nm excitation) of stimulated myocyte calcium transients; furthermore, isoproterenol induced a second spontaneous component in the calcium transients of 62% of treated myocytes ( $n = 72$ ). Halothane (1.5%, 0.53 mM) significantly decreased the amplitude of isoproterenol-induced DADs ( $P < 0.01$ ). Halothane not only reduced the peak ratio of the stimulated calcium transient, but also eliminated the second spontaneous component in myocytes previously exposed to isoproterenol ( $n = 14$ ). Elevated extracellular calcium concentrations (5 mM) restored the amplitudes of DADs and the second components of the calcium transients in myocytes exposed to isoproterenol and halothane. These data suggest that halothane opposes isoproterenol-induced DADs by altering intracellular calcium stores. The authors' findings do not support a role for DAD-induced triggered activity in the genesis of anesthetic-catecholamine dysrhythmias. (Key words: Anesthetics, volatile: halothane. Ions, calcium: calcium transient; fura-2. Heart: arrhythmias. Heart, myocytes: delayed afterdepolarizations. Sympathetic nervous system, beta-adrenergic agonists: isoproterenol.)

HALOTHANE is known for its ability to reduce the dose of exogenously administered catecholamines required to induce ventricular dysrhythmia.<sup>1,2</sup> Despite extensive investigation, the mechanisms underlying anesthetic-catecholamine dysrhythmias are poorly understood.<sup>2</sup> It has been suggested that triggered activity (TA) associated with delayed afterdepolarizations (DADs) may play a role in the genesis of dysrhythmias that result from the interac-

tion of halothane with catecholamines<sup>3</sup>; however, the electrophysiologic effects of halothane have not been evaluated with the use of an experimental model of catecholamine-induced DADs in ventricular tissue.

DADs are oscillations in membrane potential that occur after repolarization of an action potential and are caused by that preceding action potential.<sup>4</sup> DADs can precipitate cardiac dysrhythmias by evoking excitation in otherwise nonautomatic cells.<sup>4–6</sup> DADs are most easily induced under conditions that favor excess concentrations of intracellular free calcium ( $[Ca^{2+}]_i$ ): increased extracellular calcium,<sup>7</sup> catecholamine stimulation,<sup>7–10</sup> ischemia and infarction,<sup>8,11</sup> and cardiac glycoside toxicity.<sup>10,12,13</sup> DADs are caused by a transient inward current ( $I_{ti}$ ) that is distinct from those responsible for the normal action potential.<sup>13</sup> The cellular basis for  $I_{ti}$  is controversial.<sup>5,6</sup> One hypothesis favors current through a nonselective membrane cation channel with conductance regulated by intracellular calcium.<sup>14–16</sup> Electrogenic  $Na^+ - Ca^{2+}$  exchange is an alternate mechanism suggested for  $I_{ti}$ .<sup>17,18</sup> Evidence exists for both mechanisms, and both may be involved.<sup>19,20</sup>

Pharmacologic agents can influence DADs through action at several different sites (reviewed by Wit and Rosen<sup>5</sup>). Drugs that change the time course of repolarization, by modification of inward sodium or calcium currents or outward potassium currents, can affect DADs by indirectly affecting the intracellular concentration of calcium. Drugs that act intracellularly at the level of the sarcoplasmic reticulum (SR) can influence DADs either by suppressing or enhancing oscillatory movements of calcium between SR and myoplasm. In addition, drugs that affect  $Na^+ - Ca^{2+}$  exchange or the membrane channels associated with  $I_{ti}$  may modify DADs. The effects of halothane on DADs and TA are difficult to predict. The anesthetic could potentially affect the development of DADs not only at the sarcolemma but also at the SR. Halothane would be expected to suppress DADs and TA, on the basis of its inhibition of transsarcolemmal calcium flux<sup>21–23</sup> and its ability to decrease SR capacity for calcium (reviewed by Rusy and Komai<sup>24</sup>). However, halothane depletes the SR of calcium not only by decreasing calcium uptake, but also by enhancing calcium release.<sup>24–26</sup> On the basis of its ability to promote SR calcium release, halothane may potentiate the development of DADs and TA. Indeed, the effects of halothane on intracellular calcium have been compared to those of caffeine.<sup>27,28</sup> Caffeine is also known

\* Graduate research fellow, Department of Veterinary Physiology and Pharmacology.

† Postdoctoral fellow, Department of Physiological Chemistry.

Received from the Department of Veterinary Physiology and Pharmacology and the Department of Physiological Chemistry, Ohio State University, Columbus, Ohio. Accepted for publication September 10, 1990. Supported in part by The Ohio State University College of Veterinary Medicine Canine Research Fund; the American Heart Association, Ohio Affiliate (postdoctoral fellowship to QL); and United States Public Health Service grant HL36240. Preliminary findings were presented at the 1989 Veterinary Midwest Anesthesia Conference (Urbana, Illinois, June 3, 1989) and published in abstract form (Vet Surg 18:405–406, 1989).

Address reprint requests to Dr. Freeman: Department of Physiology, University of Rochester Medical Center, 601 Elmwood Avenue, Box 642, Rochester, New York 14642.

to release calcium from and to impair its re-uptake into the SR of cardiac muscle; caffeine is capable of promoting and suppressing DADs and TA.<sup>29,30</sup>

Halothane has been shown to decrease the amplitude of DADs induced by cardiac glycosides in isolated atrial muscle<sup>31</sup> and Purkinje fibers<sup>32</sup> and to oppose formation of triggered dysrhythmias associated with digitalis intoxication.<sup>33</sup> It may not be assumed, however, that the effects of halothane on DADs and TA induced by catecholamines will be similar to its effects on DADs and TA associated with cardiac glycoside toxicity. Prominent differences can be found between properties of DADs and TA caused by digitalis and those caused by calcium overload unrelated to blockade of the  $\text{Na}^+/\text{K}^+$  pump.<sup>5,34</sup> The current study was designed to document the effects of halothane on DADs and TA induced in isolated myocytes by isoproterenol. In addition, the effects of halothane on the intracellular free calcium transient were determined in the presence and absence of isoproterenol to explore the cellular mechanisms responsible for halothane effects on DADs.

## Materials and Methods

### CELL ISOLATION

As specified in a protocol approved by the Institutional Laboratory Animal Care Committee of The Ohio State University, mongrel dogs weighing 15–25 kg were anesthetized with sodium pentobarbital (30 mg/kg, iv). Their hearts were rapidly removed by a right lateral thoracotomy and placed in iced-cold physiologic saline. Myocytes were isolated by the collagenase perfusion technique described in detail by Hohl *et al.*<sup>35</sup> Briefly, an excised segment of canine left ventricle was perfused through the left anterior descending coronary artery at 20 ml/min with the following (in millimolar concentrations): 60 NaCl; 16 KCl; 3.25  $\text{MgSO}_4$ ; 1.2  $\text{KH}_2\text{PO}_4$ ; 25  $\text{NaHCO}_3$ ; 10 taurine; 11 glucose; 5 pyruvate; 80 mannitol; 0.05 ethyleneglycol-bis( $\beta$ -aminoethyl ether)N,N,N',N'-tetraacetic acid (EGTA); 0.005 adenosine; amino acids (minimum essential medium [MEM] and basal Eagle's medium [BME; GIBCO]); collagenase (1 mg/ml, Types I and IV, Worthington Biochemical); and bovine serum albumin (BSA; 1 mg/ml), pH 7.4, 37° C. As the tissue began to soften, the perfusate was switched to Krebs-Henseleit buffer containing the following (in millimolar concentrations): 118 NaCl, 4.8 KCl, 25  $\text{NaHCO}_2$ , 1.2  $\text{KH}_2\text{PO}_4$ , 1.2  $\text{MgSO}_4$ , 11 glucose, 5 pyruvate, amino acids, BSA, and collagenase. Calcium (1 mM) was added incrementally. When digestion was complete, the piece was abraded and the tissue slurry incubated in the perfusate. The dispersed myocytes were filtered through cheesecloth, sedimented, and resuspended in enzyme-free Krebs-Henseleit solution containing 11 mM glucose, 5 mM pyruvate, 2% BSA, and 25 mM HEPES.

### CALCIUM TRANSIENTS

Isolated myocytes were loaded with the acetoxymethyl ester of fura-2 (fura-2/AM) by a 5–10-min incubation in HEPES-buffered Krebs-Henseleit solution containing 2  $\mu\text{M}$  fura-2/AM, followed by at least 2 h postincubation in fura-2-free solution, at room temperature. The brief exposure of the cells to fura-2/AM was necessary to eliminate excess intracellular dye accumulation. Satisfactory signal to noise ratios were obtained by the dye trapped inside the myocytes after 5–10 min exposure. The prolonged postincubation was used to facilitate hydrolysis of the ester form of fura-2.

Fura-2 fluorescence measurements were made as previously described.<sup>36,37</sup> Briefly, fura-2-loaded cells were placed in a perfusion chamber mounted on the stage of an inverted microscope (IM, Zeiss) and perfused continuously with Krebs-Henseleit bicarbonate buffer (2 mM  $\text{Ca}^{2+}$ ) that was aerated with 95%  $\text{O}_2$ /5%  $\text{CO}_2$  and maintained at 37° C, pH 7.3. Experimental compounds were added to the Krebs-Henseleit buffer, and exchange of solutions was accomplished by a pressurized valving system. Cells were stimulated by passing currents through two platinum electrodes positioned in parallel at either side of the perfusion chamber. A single quiescent, rod-shaped myocyte was selected and stimulated continuously at 0.5 Hz.

Fluorescence from the cell was recorded with the use of a PTI Deltascan system (South Brunswick, NJ). Briefly, the PTI Deltascan system was used to provide ultraviolet excitation by a 75-W xenon lamp. Two excitation wavelengths (350 and 380 nm) were switched at 80–100 Hz. Emission (420–620 nm) from the cell at the two excitation wavelengths was collected by a photomultiplier tube (Hamamatsu 928 PMT) and stored in the IBM/AT-Deltascan system. Each myocyte served as its own control. Sixteen to 20 triggered fluorescence transients were recorded for each experimental condition. Eight to 16 transients at steady state were curve-averaged with the use of the residue program provided for off-line data analysis. Because uncertainty exists regarding the accuracy of fluorescence calibration, calculation of intracellular calcium concentrations was avoided by comparing peak fluorescence ratios (350/380 nm excitation) of treated and control myocytes with the use of arbitrary units of fluorescence.

### ELECTROPHYSIOLOGY

Myocytes free of fura-2 were transferred to a Plexiglass acrylic plastic perfusion chamber on the stage of an inverted microscope and perfused with bicarbonate-buffered Krebs-Henseleit (2 mM  $\text{Ca}^{2+}$ ) that was aerated with 95%  $\text{O}_2$ /5%  $\text{CO}_2$  and maintained at 37° C, pH 7.3. Action potentials were recorded with the use of standard micro-

electrode techniques, as described in detail by Li *et al.*<sup>37</sup> Briefly, myocytes were impaled intracellularly with the use of glass microelectrodes filled with 1 M KCl (tip resistance 120–200 M $\Omega$ ). Electrical stimulation of isolated cells was achieved by passing intracellular current pulses through the impaling electrode.

After a 10-min equilibration period, quiescent rod-shaped cells with resting membrane potentials negative to  $-75$  mV were driven for 5, 10, or 20 beats at basic cycle lengths (BCLs) of 200–1,000 ms. The period immediately after the last beat of the train of stimuli was observed for the appearance of DADs. If no DADs were observed under control conditions, the stimulation protocol was repeated while the cells were perfused with buffer, containing first isoproterenol alone, and then containing isoproterenol and halothane. In a limited number of experiments, the drugs were washed out and the stimulation protocol was repeated, first in the presence of isoproterenol and halothane, and then in the presence of isoproterenol and halothane and elevated calcium levels (5 mM). When DADs were present, the amplitudes of the first DAD following the train was measured from maximum diastolic potential to the peak of the DADs.<sup>13</sup> Coupling intervals were measured from the upstroke of the preceding action potential to the peak of the DAD.<sup>13</sup>

#### DRUG PROTOCOLS

1. **Halothane:** Halothane was added to the perfusate with the use of a calibrated vaporizer. The carrier gas was 95% O<sub>2</sub>/5% CO<sub>2</sub>. Halothane concentrations were verified with the use of gas chromatography (Varian); a vaporizer setting of 1.5% yielded on average a chamber concentration of 0.53 mM halothane. Intracellular calcium transients were measured in cells exposed to halothane (0.75–3%), in the presence and absence of

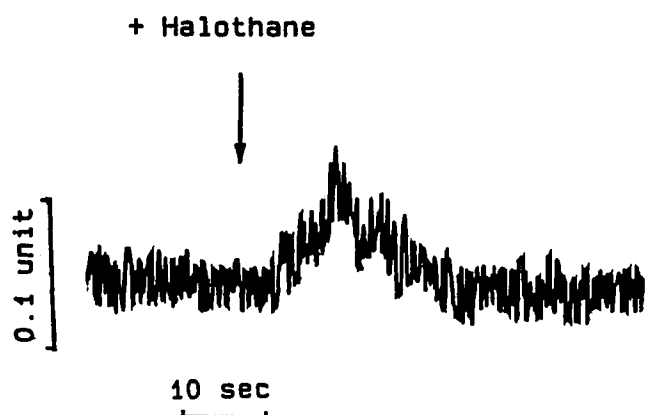

FIG. 1. Calcium response from quiescent canine myocyte during acute introduction of halothane (1.5 vol% = 0.52 mM, 37° C). The response shown was observed in 50% of 14 fura-2-loaded myocytes acutely exposed to halothane.

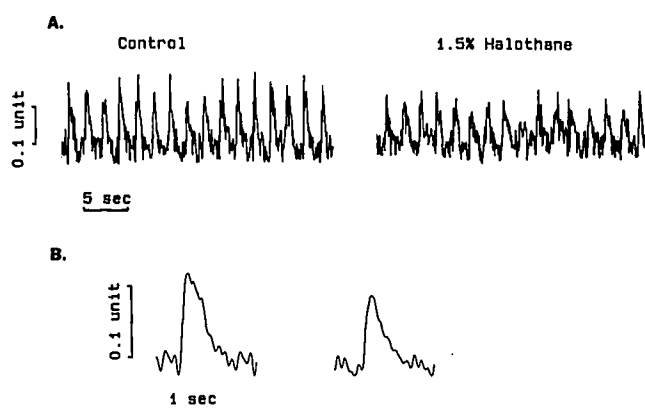

FIG. 2. Representative recordings of Ca<sup>2+</sup> transients from a single canine myocyte presented on the same absolute scale. (A) Fura-2-loaded myocytes were perfused with Krebs–Henseleit bicarbonate buffer at 37° C and pH 7.3 and excited by electrical field stimulation (0.5 Hz). The elicited Ca<sup>2+</sup> transients (fluorescence ratios 350/380-nm excitation) were recorded from a single myocyte in the absence and presence of 1.5% halothane. (B) Averaged Ca<sup>2+</sup> transients from 16 consecutive beats in (A) demonstrate the depressant effect of halothane on the Ca<sup>2+</sup> transients.

isoproterenol (100 nM). The effects of halothane (1.5%) on the amplitude of isoproterenol-induced DADs were examined in a separate set of experiments.

2. **Isoproterenol:** Isoproterenol solutions were freshly prepared before each experimental period. The heavy metal chelator ethylenediaminetetraacetic acid disodium dihydrate (Na<sub>2</sub>EDTA) (50  $\mu$ M) was added to all solutions containing isoproterenol to retard oxidation. DADs and/or TA were induced in canine myocytes exposed to isoproterenol concentrations in the range 10 nM to 1  $\mu$ M. In preliminary experiments, isoproterenol concentrations less than 100 nM did not induce DADs consistently, whereas isoproterenol concentrations greater than 100 nM often induced early afterdepolarizations and TA in addition to DADs. Therefore, isoproterenol (100 nM) was used in subsequent experiments.

#### STATISTICAL ANALYSIS

Delayed afterdepolarization amplitudes and peak heights of calcium transients were compared with the use of either the *t* test for paired data or repeated measures analysis of variance with Bonferroni's modification of the *t* test. Results are presented as mean  $\pm$  SEM. A probability level of 0.05 was used to detect significant differences.

#### Results

##### CALCIUM TRANSIENTS

Acute exposure of canine myocytes to perfusate containing halothane (1.5%) caused a transitory increase in

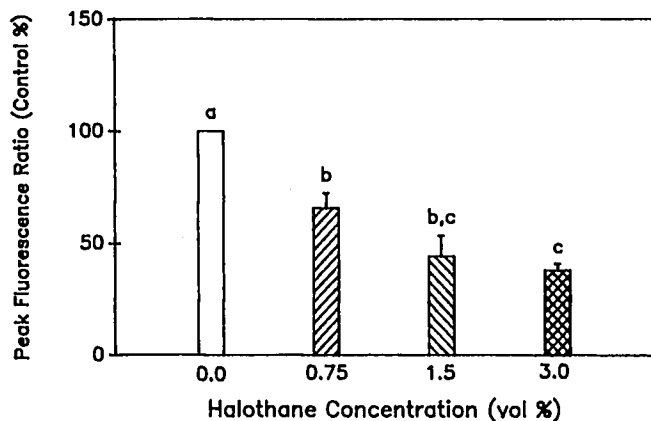

FIG. 3. Concentration-dependent depression by halothane of  $\text{Ca}^{2+}$  transients from electrically stimulated (0.5 Hz) myocytes. Summarized data from myocytes exposed to varying concentrations of halothane for approximately 1 min (0.0% [n = 14]; 0.75% [n = 5]; 1.5% [n = 7]; 3% [n = 7]). To facilitate comparisons, data are expressed as percentage of the peak fluorescence ratio measured under control conditions. Bars without a common superscript are significantly different at  $P < 0.05$ .

free intracellular calcium in 50% of myocytes studied (n = 14). Fluorescence from a quiescent myocyte acutely exposed to halothane is shown in figure 1. This calcium transient produced during the introduction of halothane was not an artifact of changing solutions; similar calcium transients were not produced by changing from control solution to control solution. Acute introduction of halothane (1.5%) to electrically stimulated myocytes also resulted in brief enhancement of calcium transients in 50%

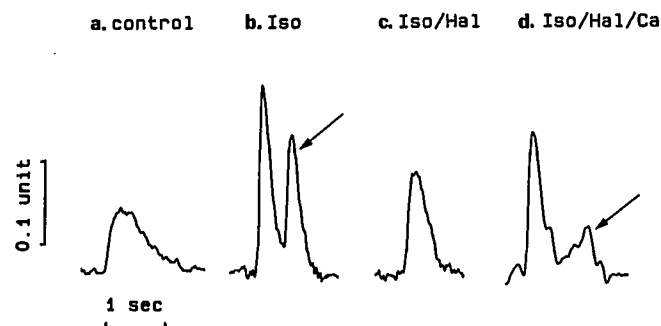

FIG. 4. Effects of isoproterenol, halothane, and high  $[\text{Ca}^{2+}]_o$  on  $\text{Ca}^{2+}$  transients from electrically stimulated (0.5 Hz) canine myocytes. Fluorescence data (ratio 350/380-nm excitation) from a single myocyte under four different conditions are presented on the same absolute scale. Each trace represents the average of 16 consecutive beats at steady state. (A) Control. (B) Isoproterenol (100 nM) increased the magnitude and shortened the duration of the stimulated  $\text{Ca}^{2+}$  transient. A second spontaneous component of the  $\text{Ca}^{2+}$  transient (arrow) was also evident in the presence of isoproterenol. (C) Halothane (1.5%) not only depressed the peak of the  $\text{Ca}^{2+}$  transient but also eliminated the second component. (D) A second spontaneous component of the calcium transient was again evident when  $[\text{Ca}^{2+}]_o$  was increased from 2 to 5 mM.

of cells studied (n = 9); however, within 1 min of the introduction of halothane, the amplitude of stimulated calcium transients was decreased consistently (fig. 2). Halothane decreased the peak ratio of calcium transients in a concentration-dependent manner (fig. 3).

The beta-adrenoceptor agonist isoproterenol (100 nM) increased the peak ratio of stimulated myocyte calcium transients; furthermore, in 62% of myocytes treated (n = 72), 100 nM isoproterenol induced a second spontaneous component in the calcium transient (figs. 4 and 5). Halothane antagonized isoproterenol enhancement of the calcium transient in all cells. In cells previously exposed to 100 nM isoproterenol (n = 15), halothane (1.5%) not only reduced the peak ratio of the stimulated calcium transient, but also eliminated the second component (figs. 4 and 5). Increasing the extracellular calcium concentration ( $[\text{Ca}^{2+}]_o$ ) from 2 to 5 mM restored the second component of the calcium transient in myocytes previously exposed to isoproterenol (100 nM) and halothane (1.5%) (figs. 4 and 5); 5 mM  $[\text{Ca}^{2+}]_o$  alone did not induce a second component in the calcium transient (n = 10).

## ELECTROPHYSIOLOGY

When canine ventricular myocytes were stimulated with trains of 5, 10, or 15 impulses delivered at a BCL of 200–1,000 ms, neither TA nor DADS were recorded under control conditions from any of 30 myocytes isolated from six hearts. Identical stimulation protocols did induce DADs and TA in cells exposed to isoproterenol (100 nM). The amplitudes of the DADs induced by isoproterenol

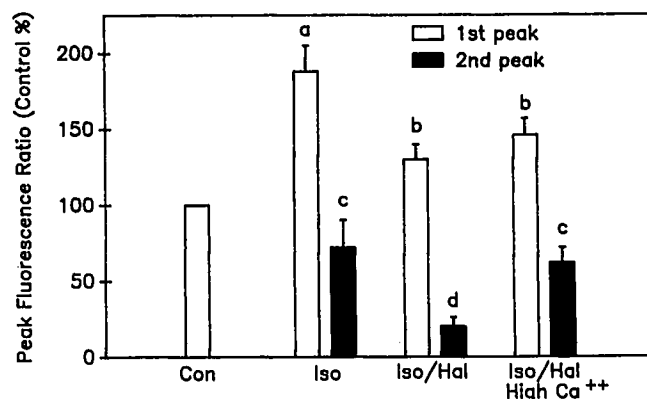

FIG. 5. Effects of isoproterenol, halothane, and high  $[\text{Ca}^{2+}]_o$  on  $\text{Ca}^{2+}$  transients from electrically stimulated (0.5 Hz) myocytes. In untreated cells, only  $\text{Ca}^{2+}$  transients with a single stimulated peak were seen. Isoproterenol (100 nM) caused the appearance of  $\text{Ca}^{2+}$  transients with a second spontaneous component. Halothane depressed both the first and second peaks of  $\text{Ca}^{2+}$  transients in cells previously exposed to isoproterenol. Increasing  $[\text{Ca}^{2+}]_o$  from 2 to 5 mM restored the second but not the first peak of  $\text{Ca}^{2+}$  transients in cells exposed to both isoproterenol and halothane. Bars without a common superscript are significantly different at  $P < 0.05$  (n = 15).

were influenced both by the number and BCL of the applied stimuli; DAD amplitudes tended to increase as the number of preceding beats increased (fig. 6) or the BCL shortened (fig. 7). With the use of trains of 10 stimuli, DADs were first induced at BCLs of 900–1,000 ms in 54% of myocytes; 700–800 ms in 18% of myocytes; 500–600 ms in 0% of myocytes; and 300–400 ms in 8% of myocytes ( $n = 24$ ). TA, consisting of either one to three undriven action potentials or sustained runs of electrical activity, was observed in 46% of the 24 myocytes studied. In myocytes exhibiting TA, undriven action potentials were first recorded at BCLs of 900–1,000 ms in 18%; 700–800 ms in 55%; 500–600 ms in 18%; and 300–400 ms in 9%. The coupling interval of TA to the last driven action potential coincided approximately with that of the preceding DADs (fig. 7).

Triggered activity observed in the presence of isoproterenol was eliminated during introduction of 1.5% halothane ( $n = 10$ ) and returned on washout of halothane. Acute exposure to halothane consistently suppressed DADs, even though 50% of fura-2-loaded cells showed a transient increase in free intracellular calcium during similar introduction of halothane (see above). In myocytes exposed sequentially to isoproterenol, then isoproterenol

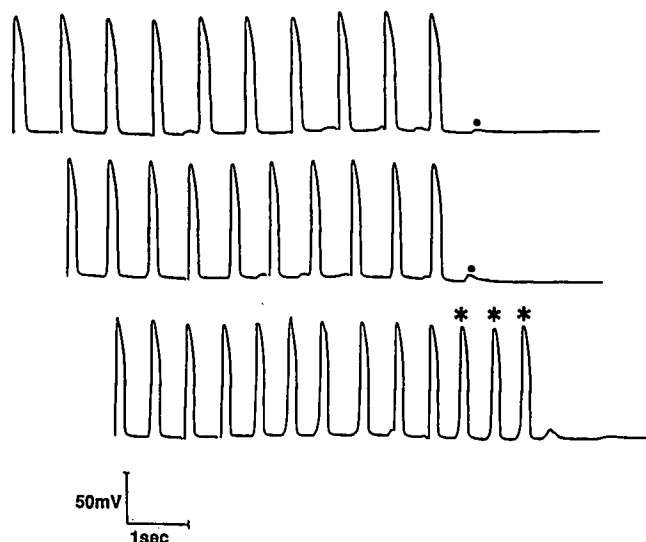

FIG. 7. The amplitude of isoproterenol-induced delayed afterdepolarizations (DAD) increased as the drive cycle length decreased. Representative records from an isolated myocyte stimulated using trains ten stimuli at basic cycle lengths of 800 (*top*), 700 (*middle*), and 600 (*bottom*) ms, in the presence of 100 nM isoproterenol. The first DAD after each train of stimuli is indicated by a dot. Undriven action potentials are indicated by asterisks.

with halothane, the amplitude of DADs observed in the presence of isoproterenol was  $5.9 \pm 0.6$  mV, whereas the amplitude of DADs observed during the acute introduction of halothane was  $2.4 \pm 0.7$  mV ( $n = 11$ ,  $P < 0.01$ ). Halothane significantly decreased the amplitude of DADs induced over the range of BCLs studied (fig. 8); DAD amplitudes diminished by halothane were restored during washout of the anesthetic.

In the presence of halothane, the amplitudes of iso-

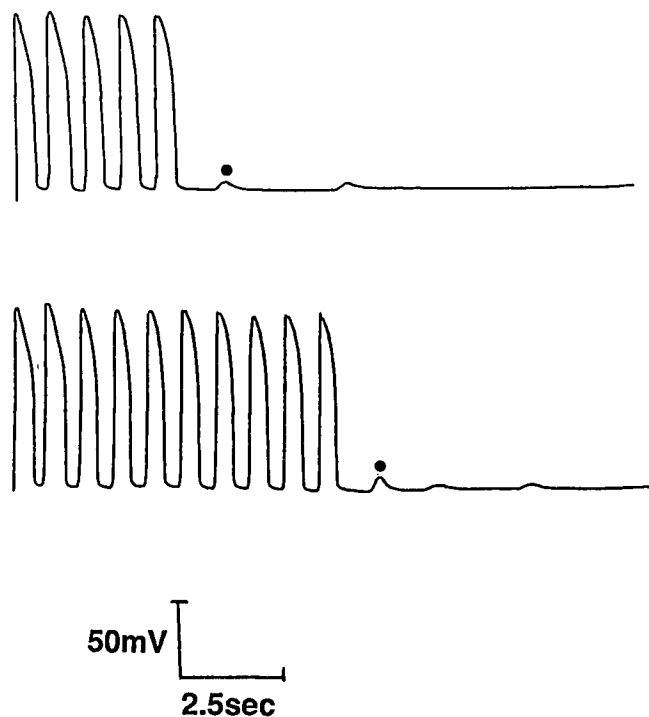

FIG. 6. The amplitude of isoproterenol-induced delayed afterdepolarizations (DAD) increased as the number of preceding driven action potentials increased. Representative records from an isolated myocyte stimulated at a drive cycle length of 800 ms with trains of five (*top*) and ten (*bottom*) stimuli, in the presence of 100 nM isoproterenol. The first DAD after each train of stimuli is indicated by a dot.

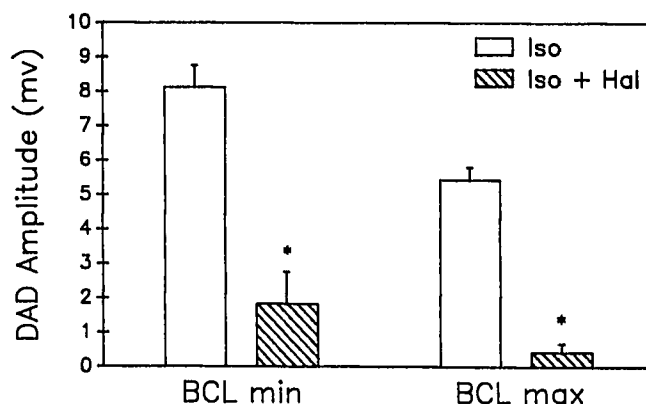

FIG. 8. Effect of halothane (1.5%, 60–90 s) on the amplitude of delayed afterdepolarizations (DAD) induced by isoproterenol (100 nM) with trains of ten stimuli. Data shown for the shortest (BCL min) and longest (BCL max) basic drive cycle lengths at which stable DAD were induced ( $n = 24$ ). Amplitudes depicted for the first DAD after the stimulus train. Asterisks indicate a significant difference due to the addition of halothane ( $P < 0.01$ ).

proterenol-induced DADs were restored by increasing  $[Ca^{2+}]_o$  from 2 to 5 mM (fig. 9). The effect of high calcium concentrations on DAD amplitude was reversed on return to physiologic concentrations (2 mM); 5 mM calcium alone did not induce DADs ( $n = 5$ ).

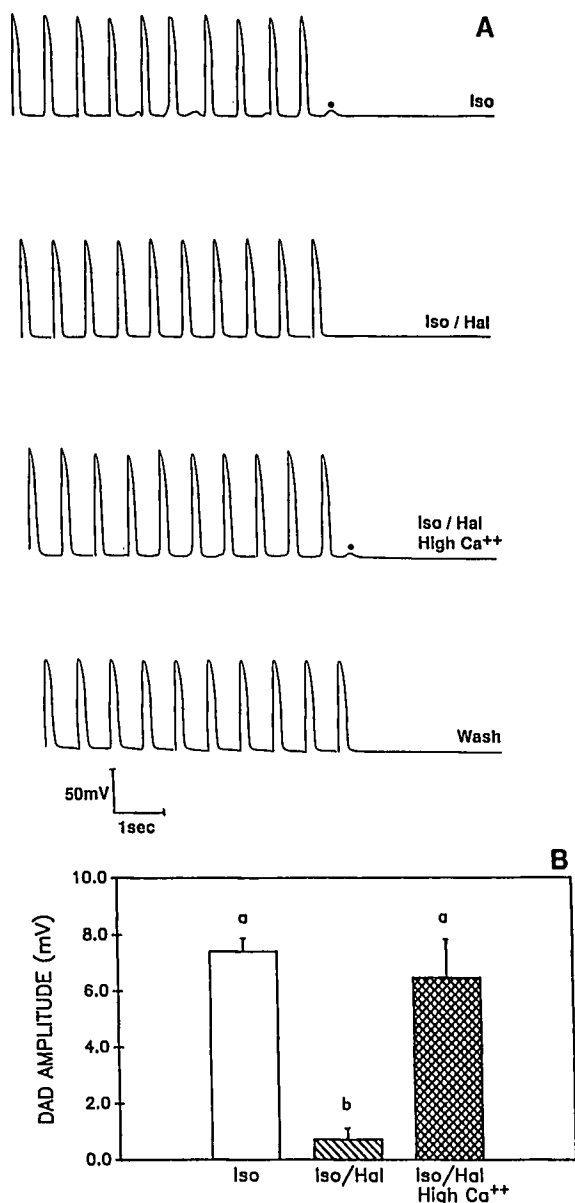

FIG. 9. Restoration by calcium of delayed afterdepolarizations (DAD) suppressed by halothane. (A) Representative data from a single myocyte. Where present, the first DAD after each train of stimuli is indicated by a dot. DAD were induced by exposure to isoproterenol (100 nM) in the presence of a physiologic  $[Ca^{2+}]_o$  (2 mM) (first trace). Halothane (1.5%) significantly decreased the amplitude of such DAD (second trace). Subsequent exposure of halothane-treated myocytes to a higher  $[Ca^{2+}]_o$  (5 mM) restored DAD amplitude (third trace). DAD were abolished upon return to control conditions (fourth trace). BCL = 650. (B) Summary data from eight myocytes. Bars without a common superscript are significantly different at  $P < 0.01$ .

## Discussion

In the current study, we developed and used a myocyte model to study the effects of halothane on isoproterenol-induced DADs. In addition, halothane effects on free intracellular calcium transients were determined in fura-2-loaded myocytes exposed to isoproterenol, and the results were correlated with the electrophysiologic data. Halothane depressed the amplitudes of both isoproterenol-induced DADs and isoproterenol-enhanced calcium transients in canine myocytes. These data suggest that halothane opposes formation of catecholamine-induced DADs and TA by altering intracellular calcium stores.

Delayed afterdepolarizations have been observed previously in cardiac myocytes exposed to isoproterenol.<sup>38</sup> Preliminary reports from our laboratory and others<sup>39-42</sup> have suggested that isolated heart cells can be used to study catecholamine-induced TA. In these experiments, we used isoproterenol to induce DADs in canine myocytes and found that the characteristic properties of the DADs were similar in many respects to those of DADs induced by catecholamines in multicellular preparations. When DADs were induced, the amplitude of the first afterdepolarization increased as the drive cycle length decreased, resulting, in some cases, in TA (fig. 7). DAD amplitude also was dependent on the number of preceding action potentials (fig. 6). Thus, the dependence of DAD amplitude on rate and rhythm was similar in isolated myocytes and multicellular preparations.<sup>8,9</sup> Similarities in DAD behavior between isolated cells and tissues strongly support similarities in underlying mechanisms. Activation of  $I_{ij}$  by an increase in intracellular calcium concentration is believed to be responsible for generating DADs and TA in myocytes as well as in multicellular preparations.<sup>39,41,43,44</sup>

A transitory increase in free intracellular calcium during acute exposure of canine myocytes to halothane was observed inconsistently when intracellular calcium was monitored with the use of fura-2 fluorescence of individual cells (fig. 1). Transient increases in fluorescence during introduction of halothane were previously described in suspensions of rat heart cells loaded with either quin-2<sup>27</sup> or fura-2.<sup>28</sup> This difference between our data and those of the other groups<sup>27,28</sup> may reflect species differences in myocyte calcium handling,<sup>45</sup> differences in methods,<sup>46</sup> or both. Our finding that halothane decreased the peak height of the intracellular free calcium transient in electrically stimulated myocytes (figs. 2 and 3) is similar to published observations from isolated ventricular myocytes<sup>28</sup> and multicellular preparations.<sup>47,48</sup> Bosnjak *et al.*<sup>48</sup> reported a 55% decrease in intracellular calcium, induced by 0.55 mM halothane; our data demonstrate a 56% decrease in intracellular calcium, in the presence of 0.53 mM halothane (fig. 3).

We have shown for the first time depression of isopro-

terenol-enhanced calcium transients by halothane. In cells previously exposed to isoproterenol, halothane not only reduced the peak ratio of the stimulated calcium transient, but also eliminated the second spontaneous component (figs. 4 and 5). Such secondary fluctuations in fluorescence have been associated with activation of  $I_{\text{ti}}$  and induction of DADs and aftercontractions in myocytes.<sup>40,44</sup> Halothane consistently depressed isoproterenol-induced DADs and TA in cardiac myocytes (fig. 8). Depression of DADs by halothane was probably related to similar effects on the intracellular calcium transients.

Proposed mechanisms for induction of DADs by isoproterenol are shown in figure 10. Our observation that increased extracellular calcium can restore DADs suppressed by halothane (fig. 9) suggests that halothane opposes DAD formation by reducing the amount of intracellular calcium available to activate  $I_{\text{ti}}$ . Reduction of available calcium may involve halothane action at several sites. Halothane may interfere with isoproterenol stimulation of inward calcium current by decreasing sarcolemmal beta-adrenoceptor density,<sup>49,50</sup> by interfering with the generation of the second messenger cyclic adenosine monophosphate (cAMP),<sup>51,52</sup> or by decreasing the mag-

nitude of the slow inward calcium current ( $I_{\text{si}}$ ) by some direct action at the L-type calcium channel.<sup>21-23,53,54</sup> In addition, halothane may decrease the total calcium content of myocytes by interfering with SR calcium storage.<sup>24-28</sup> Halothane depression of intracellular calcium transients, in the presence and absence of isoproterenol, is consistent with these proposed mechanisms for suppression of DADs.

Spontaneous "aftertransients" similar to those shown in figure 4 have been associated with activation of  $I_{\text{ti}}$  by calcium-induced calcium release from SR.<sup>19,44</sup> In all mammalian species, calcium released from the SR dominates the calcium transient; however, calcium entering the cytoplasm through L-type calcium channels does make a direct contribution to the calcium transient.<sup>55</sup> Halothane-induced decreases in the peak height of calcium transients have been associated with both depletion of SR  $\text{Ca}^{2+}$ <sup>28</sup> and reduction of  $I_{\text{si}}$ .<sup>2,47,48</sup> Volatile anesthetics have also been shown to inhibit  $\text{Na}^+$ - $\text{Ca}^{2+}$  exchange<sup>56,57</sup> and to decrease the magnitude of other transsarcolemmal ionic currents.<sup>22</sup> Direct effects of halothane on  $I_{\text{ti}}$  cannot be ruled out on the basis of the data presented and may exist, in addition to halothane effects on inward calcium current and intracellular calcium storage.

The mechanisms responsible for halothane suppression of isoproterenol-induced DADs may be similar to those responsible for halothane suppression of ouabain-induced DADs; in both settings DADs are restored by increased  $[\text{Ca}^{2+}]_o$ .<sup>32</sup> Additional experimentation will be necessary to clarify the mechanisms by which halothane antagonizes isoproterenol-induced DADs and TA.

We investigated the effects of halothane on catecholamine-induced DADs and TA, a potential mechanism for clinically significant dysrhythmias. In isolated canine myocytes, halothane depressed DADs and TA induced by the beta-adrenergic agonist isoproterenol. Both alpha- and beta-adrenergic stimulation are believed to play a role in the genesis of anesthetic-catecholamine arrhythmias.<sup>2</sup> In view of recent findings that alpha-adrenoceptor stimulation neither induces DADs<sup>39</sup> nor potentiates DADs induced by beta-adrenoceptor stimulation,<sup>42</sup> our data suggest that DADs and associated TA are unlikely to play an important role in the dysrhythmogenic interaction between halothane and adrenergic amines. However, additional experiments are needed to determine the combined effects of halothane and alpha- and beta-adrenergic stimulation.

The authors thank W. W. Muir and R. A. Altschuld for invaluable guidance and support during all stages of this project; B. T. Stokes for providing the PTI system used to study calcium transients; B. A. Biagi for use of his laboratory during electrophysiologic experiments; D. K. Wimsatt and C. M. Hohl for assistance with cell isolation; and Z. Guan and L. Bednarski for excellent technical support.

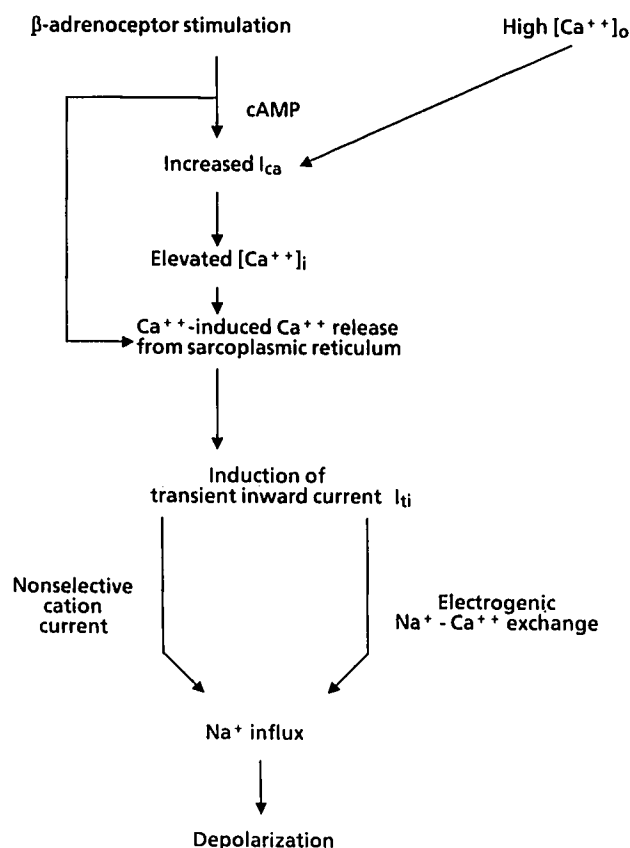

FIG. 10. Mechanisms proposed for induction of delayed afterdepolarizations by  $\beta$ -adrenergic agonists such as isoproterenol.

## References

1. Reynolds AK: On the mechanism of myocardial sensitization to catecholamine by hydrocarbon anesthetics. *Can J Physiol Pharmacol* 62:183-198, 1984
2. Atlee JL, Bosnjak Z: Mechanisms for cardiac dysrhythmias during anesthesia. *ANESTHESIOLOGY* 72:347-374, 1990
3. Mayer DB, Miletich DJ, Feld JM, Albrecht RF: The effects of magnesium salts on the duration of epinephrine-induced ventricular tachyarrhythmias in anesthetized rats. *ANESTHESIOLOGY* 71:923-928, 1989
4. Cranefield PF: Action potentials, afterpotentials and arrhythmias. *Circ Res* 41:415-423, 1977
5. Wit AL, Rosen MR: Afterdepolarizations and triggered activity, *The Heart and Cardiovascular System*. Edited by Fozzard HA. New York, Raven Press, 1986, pp 1449-1485
6. January CT, Fozzard HA: Delayed afterdepolarizations in heart muscle: Mechanisms and relevance. *Pharmacol Rev* 40:219-227, 1988
7. Hirakawa M, Okamoto Y, Sano T: Effects of  $Ca^{++}$  and  $K^{+}$  on oscillatory afterpotentials in dog ventricular muscle fibers. *J Mol Cell Cardiol* 11:999-1015, 1979
8. El-Sherif N, Gough WB, Zeiler RH, Mehra R: Triggered ventricular rhythms in one day old myocardial infarction in the dog. *Circ Res* 52:566-579, 1983
9. Wit AL, Cranefield PF: Triggered and automatic activity in the canine coronary sinus. *Circ Res* 41:435-445, 1977
10. Dangman KH, Danilo P, Hordorf AJ, Mary-Rabine L, Reder F, Rosen MR: Electrophysiologic characteristics of human ventricular and Purkinje fibers. *Circulation* 65:362-368, 1982
11. Ferrier GR, Moffat MP, Lukas A: Possible mechanisms of ventricular arrhythmias elicited by ischemia followed by reperfusion. *Circ Res* 56:184-194, 1985
12. Ferrier GR, Saunders JH, Mendez C: A cellular mechanism for the generation of arrhythmias by acetylcholine. *Circ Res* 32:600-609, 1973
13. Lederer WJ, Tsien RW: Transient inward current underlying arrhythmogenic effects of cardiotonic steroids in Purkinje fibers. *J Physiol (Lond)* 263:73-100, 1976
14. Kass RS, Tsien RW, Weingart R: Ionic basis of transient inward current induced by strophantidin in cardiac Purkinje fibers. *J Physiol (Lond)* 281:209-226, 1978
15. Colquhoun D, Neher E, Reuter H, Stevens CF: Inward current channels activated by intracellular  $Ca$  in cultured cardiac cells. *Nature* 294:752-754, 1981
16. Ehara T, Noma A, Ono K: Calcium activated nonselective cation channel in ventricular cells isolated from adult guinea pig hearts. *J Physiol (Lond)* 403:117-133, 1988
17. Arlock P, Katzung BG: Effects of sodium substitutes on transient inward current and tension in guinea pig and ferret papillary muscle. *J Physiol (Lond)* 360:105-120, 1985
18. Fedida D, Noble D, Rankin AC, Spindler AJ: The arrhythmogenic transient inward current  $i_{ti}$  and related contraction in isolated guinea-pig ventricular myocytes. *J Physiol (Lond)* 392:523-542, 1987
19. Callewaert G, Cleeman L, Morad M: Caffeine-induced  $Ca^{2+}$  release activates  $Ca^{2+}$  extrusion via  $Na^{+}-Ca^{2+}$  exchanger in cardiac myocytes. *Am J Physiol* 257:C147-C152, 1989
20. Kimura J:  $Na-Ca$  exchange and  $Ca$ -sensitive non-selective cation current components of transient inward current in isolated cardiac ventricular cells of the guinea-pig (abstract). *J Physiol (Lond)* 407:79P, 1988
21. Ikemoto Y, Yatani A, Arimura H, Yoshitake J: Reduction of the slow inward current of isolated rat ventricular cells by thiamylal and halothane. *Acta Anaesthesiol Scand* 29:583-586, 1985
22. Niggli E, Rudisuli A, Maurer P, Weingart R: Effects of general anesthetics on current flow across membranes in guinea pig myocytes. *Am J Physiol* 256:C273-C281, 1989
23. Bosnjak ZJ, Rusch NJ: Calcium currents are decreased by halothane, enflurane, and isoflurane in isolated canine ventricular and Purkinje cells (abstract). *ANESTHESIOLOGY* 69:A452, 1988
24. Rusy BF, Komai H: Anesthetic depression of myocardial contractility: A review of possible mechanisms. *ANESTHESIOLOGY* 67:745-766, 1987
25. Su JY, Kerrick WG: Effects of halothane on caffeine-induced tension transients in functionally skinned myocardial fibers. *Pflügers Arch* 380:29-34, 1979
26. Krane EJ, Su JY: Comparison of the effects of halothane on skinned myocardial fibers from newborn and adult rabbit: II. Effects on sarcoplasmic reticulum. *ANESTHESIOLOGY* 71:103-109, 1989
27. Wheeler DM, Rice RT, Hansford RG, Lakatta EG: The effect of halothane on the free intracellular calcium concentration of isolated heart cells. *ANESTHESIOLOGY* 69:578-583, 1988
28. Katsuoka M, Kobayashi K, Ohnishi T: Volatile anesthetics decrease calcium content of isolated myocytes. *ANESTHESIOLOGY* 70:954-960, 1989
29. Vasalle M, Digenarro M: Caffeine eliminates the oscillatory current in cardiac Purkinje fibers. *Eur J Pharmacol* 94:361-362, 1983
30. Papsa P, Vasalle M: Mechanism of caffeine-induced arrhythmias in canine cardiac Purkinje fibers. *Am J Cardiol* 53:313-319, 1984
31. Luk H-N, Lin C-I, Wei J, Chang C-L: Depressant effects of isoflurane and halothane on isolated human atrial fibers. *ANESTHESIOLOGY* 69:667-676, 1988
32. Gallagher JD, Bianchi JJ, Gessman LJ: Halothane antagonizes ouabain toxicity in isolated canine Purkinje fibers. *ANESTHESIOLOGY* 71:695-703, 1989
33. Morrow DH, Townley NT: Anesthesia and digitalis toxicity: An experimental study. *Anesth Analg* 43:510-519, 1964
34. Ferrier GR, Carmeliet E: Effects of  $\alpha$ -adrenergic agents on transient inward current in rabbit Purkinje fibers. *J Mol Cell Cardiol* 22:191-200, 1990
35. Hohl CM, Hu B, Wimsatt DK, Fertel RH, Starling RC, Brierly GP, Altschuld RA: Isolated myocytes from a normal human heart. *Prog Clin Biol Res* 327:735-742, 1990
36. Li Q, Hohl CM, Altschuld RA, Stokes BT: Energy depletion-repletion and calcium transients in single cardiomyocytes. *Am J Physiol* 257:C427-C434, 1989
37. Li Q, Guan Z, Biagi BA, Stokes BT, Altschuld RA: Hyperthyroid adult rat cardiomyocytes. II. Single cell electrophysiology and free calcium transients. *Am J Physiol* 257:C957-C963, 1989
38. Belardinelli L, Isenberg G: Actions of adenosine and isoproterenol on isolated mammalian ventricular myocytes. *Circ Res* 53:287-297, 1983
39. Priori SG, Corr PB: Mechanisms underlying early and delayed afterdepolarization induced by catecholamines. *Am J Physiol* 258:H1796-H1805, 1990
40. Shieh R-C, Williford D: Intracellular  $Ca^{2+}$  oscillations as a mechanism of delayed afterdepolarizations in guinea pig ventricular myocytes (abstract). *Biophys J* 57:139a, 1990
41. Yang L, Vassalle M: The induction of overdrive excitation in isolated guinea-pig myocytes (abstract). *Biophys J* 57:137a, 1990
42. Sweiden R, Gesztelyi I, Szabo B, Lazzara R: The effects of  $\alpha_1$ -adrenergic activation on delayed afterdepolarization induced by isoproterenol, forskolin, and 3-isobutyl-1-methylxanthine in isolated cardiac ventricular myocytes of dog and guinea pig (abstract). *FASEB J* 4:A681, 1990



43. Matsuda H, Noma A, Kurachi Y, Irisawa H: Transient depolarization and spontaneous voltage fluctuations in isolated single cells from guinea pig ventricles. *Circ Res* 51:142-151, 1982
44. Berlin JR, Cannell MB, Lederer WJ: Cellular origins of the transient inward current in cardiac myocytes. *Circ Res* 65:115-126, 1989
45. Li Q, Biagi B, Hohl C, Starling R, Stokes B, Altschuld R: Effects of isoproterenol and caffeine on calcium transients and action potentials in human ventricular cardiomyocytes. *Prog Clin Biol Res* 327:743-750, 1990
46. Wheeler DM, Rice T, Lakatta E: The action of halothane on spontaneous contractile waves and stimulated contraction in isolated rat and dog heart cells. *ANESTHESIOLOGY* 72:911-920, 1990
47. Bosnjak ZJ, Kampine JP: Effects of halothane on transmembrane potentials, calcium transients, and papillary muscle tension in the cat. *Am J Physiol* 251:H374-H381, 1986
48. Bosnjak ZJ, Aggarwal A, Turner LA, Kampine JP: Differential effects of halothane, enflurane, and isoflurane on calcium transients and papillary muscle tension in the guinea pig (abstract). *ANESTHESIOLOGY* 69:A88, 1988
49. Marty JM, Nivoche Y, Nimier M, Rocchiccioli C, Luscombe F, Henzel D, Loiseau A, Desmonts JM: The effects of halothane on the human beta-adrenergic receptor of lymphocyte membranes. *ANESTHESIOLOGY* 67:974-978, 1987
50. Maze M, Marty J, Seto M, Crouzel C, Valloise JM, Crouzel M, Lancon JP, Syrota A: Myocardial beta-adrenoceptor density is decreased by halothane in dogs as assessed by positron emission tomography (abstract). *ANESTHESIOLOGY* 67:A55, 1987
51. Gagnat Y, Vulliemoz YY, Danilo P, Bernstein K, Triner L: Action of halothane on myocardial adenylate cyclase of rat and cat. *Proc Soc Exp Biol Med* 160:154-159, 1979
52. Vulliemoz Y, Verosky M, Triner L: Effect of halothane on myocardial cyclic AMP and cyclic GMP content of mice. *J Pharmacol Exp Ther* 236:181-186, 1986
53. Blanck TJ, Runge S, Stevenson RL: Halothane decreases calcium channel antagonist binding to cardiac membranes. *Anesth Analg* 67:1032-1035, 1988
54. Maze M, Prokocimer PG, Vickery RG, Gandjei RK, Hoffman BB: Molecular mechanism for halothane-induced beta-adrenergic hyporesponsiveness in vitro (abstract). *Anesth Analg* 67:S143, 1988
55. Wier WG: Cytoplasmic  $[Ca^{2+}]$  in mammalian ventricle: Dynamic control by cellular processes. *Annu Rev Physiol* 52:467-485, 1990
56. Haworth RA, Goknur AB, Berkoff HA: Inhibition of Na-Ca exchange by general anesthetics. *Circ Res* 65:1021-1028, 1989
57. Adams RJ, Pruett JK: Inhibition of cardiac sarcolemma  $Na^+/Ca^{++}$  exchange by the volatile anesthetic, enflurane (abstract). *Fed Proc* 46:398, 1987
